# Supplementary material
Source: publisher site journal article supplement (https://www.dovepress.com/article/447936)
Supplement: Supplementary file 1 [file get_supplementary_file.php]

Supplementary material

| Cause of death mentioned on patients' death certificates | AIS plus AF (N =26) | AIS alone (N=24) |
| --- | --- | --- |
| Stroke itself | 3 | 1 |
| brain herniation | 3 | 2 |
| Sepsis | 2 | 0 |
| Complications to the Stroke | 14 | 14 |
| multiorgan failure | 2 | 2 |
| Hospital-Acquired Pneumonia | 1 | 1 |
| Cardiogenic shock | 2 | 0 |
| Hemorrhagic transformation | 2 | 2 |
| Cardiopulmonary arrest | 1 | 1 |
| Recurrence Systemic embolism | 1 | 0 |
| Acute myocardial infarction | 0 | 0 |
| Metabolic acidosis | 2 | 1 |
| Chronic ischemic heart disease | 0 | 0 |
| Respiratory failure | 1 | 1 |
| Renal and hepatic diseases | 1 | 1 |
| Respiratory failure secondary aspiration pneumonia | 9 | 13 |
| Atrial fibrillation itself | 1 | 0 |

Supplementary material: Probable cause of death causes of in-hospital mortality in patients with acute ischemic stroke with or without atrial fibrillation

A patient may have more than one possible cause of death.

Neurological cause of death in AF- group =8 in AIS alone group=5

Non-neurological cause of death in AF- group =37 in AIS alone group=34
